# Supplementary material
Source: publisher site journal article supplement (https://kjim.org/upload/media/kjim-2023-207-Supplementary-Table-1.pdf)
Supplement: Supplementary file 1 [file kjim-2023-207-Supplementary-Table-1.pdf]

**Supplementary Table 1. Current use of csDMARDs**

| Medication      | Abatacept (n = 59) | csDMARDs (n = 64) |
|-----------------|--------------------|-------------------|
| MTX             | 41 (69.5)          | 8 (12.5)          |
| LEF             | 1 (1.7)            | 4 (6.3)           |
| HCQ             | 7 (11.9)           | 10 (15.6)         |
| SSZ             | 3 (5.1)            | 0 (0)             |
| TAC             | 0 (0)              | 6 (9.4)           |
| MTX + LEF       | 0 (0)              | 6 (9.4)           |
| MTX+ LEF + HCQ  | 0 (0)              | 2 (3.1)           |
| MTX + SSZ       | 0 (0)              | 3 (4.7)           |
| MTX + HCQ       | 0 (0)              | 14 (21.9)         |
| MTX + SSZ + HCQ | 0 (0)              | 1 (1.6)           |
| MTX+ TAC+ HCQ   | 0 (0)              | 1 (1.6)           |
| MTX + TAC       | 0 (0)              | 5 (7.8)           |
| LEF+ HCQ        | 0 (0)              | 1 (1.6)           |
| TAC + SSZ + HCQ | 0 (0)              | 1 (1.6)           |
| TAC + HCQ       | 0 (0)              | 2 (3.1)           |

Values are presented as number (%).

csDMARDs, conventional synthetic disease-modifying anti-rheumatic drugs; HCQ, hydroxychloroquine; LEF, leflunomide; MTX, methotrexate; SSZ, sulfasalazine; TAC, tacrolimus.
